# Supplementary material for: Chlojaponilactone B Attenuates Lipopolysaccharide-Induced Inflammatory Responses by Suppressing TLR4-Mediated ROS Generation and NF-κB Signaling Pathway
Source: Molecules. 2019 Oct 16;24(20):3731. doi: 10.3390/molecules24203731 (PMC6832138; doi:10.3390/molecules24203731)
Supplement: Supplementary file 1 [file molecules-24-03731-s001.pdf]

**Chlojaponilactone B Attenuates Lipopolysaccharide-Induced Inflammatory Responses by Suppressing TLR4-Mediated ROS Generation and NF- $\kappa$ B Signaling Pathway**

Shaoxia Ye <sup>1</sup>, Qiyao Zheng <sup>1</sup>, Yang Zhou <sup>1</sup>, Bai Bai <sup>1</sup>, Depo Yang <sup>1,2</sup> and Zhimin Zhao <sup>1,2,\*</sup>

<sup>1</sup> School of Pharmaceutical Sciences, Sun Yat-sen University, Guangzhou, Guangdong 510006, People's Republic of China

yeshx9@mail2.sysu.edu.cn (S.Y.); zhengqy5@mail2.sysu.edu.cn (Q.Z.);

zhouy596@mail2.sysu.edu.cn (Z.Y.); baib6@mail2.sysu.edu.cn (B.B.);

lssydp@mail.sysu.edu.cn (D.Y.); zhaozhm2@mail.sysu.edu.cn (Z.Z.)

<sup>2</sup> Guangdong Technology Research Center for Advanced Chinese Medicine, Guangzhou, Guangdong 510006, People's Republic of China

\* Correspondence: zhaozhm2@mail.sysu.edu.cn; Tel.: +86-020-39943043

| Figure | Content                                                                   | Page |
|--------|---------------------------------------------------------------------------|------|
| S1     | <sup>1</sup> H NMR spectrum of chlojaponilactone B ( <b>1</b> )           | 3    |
| S2     | <sup>13</sup> C NMR spectrum of chlojaponilactone B ( <b>1</b> )          | 4    |
| S3     | Cytotoxicity Test                                                         | 5    |
| S4     | Figure S1. Determination of the cytotoxic effects of <b>1</b> and TAK-242 | 6    |

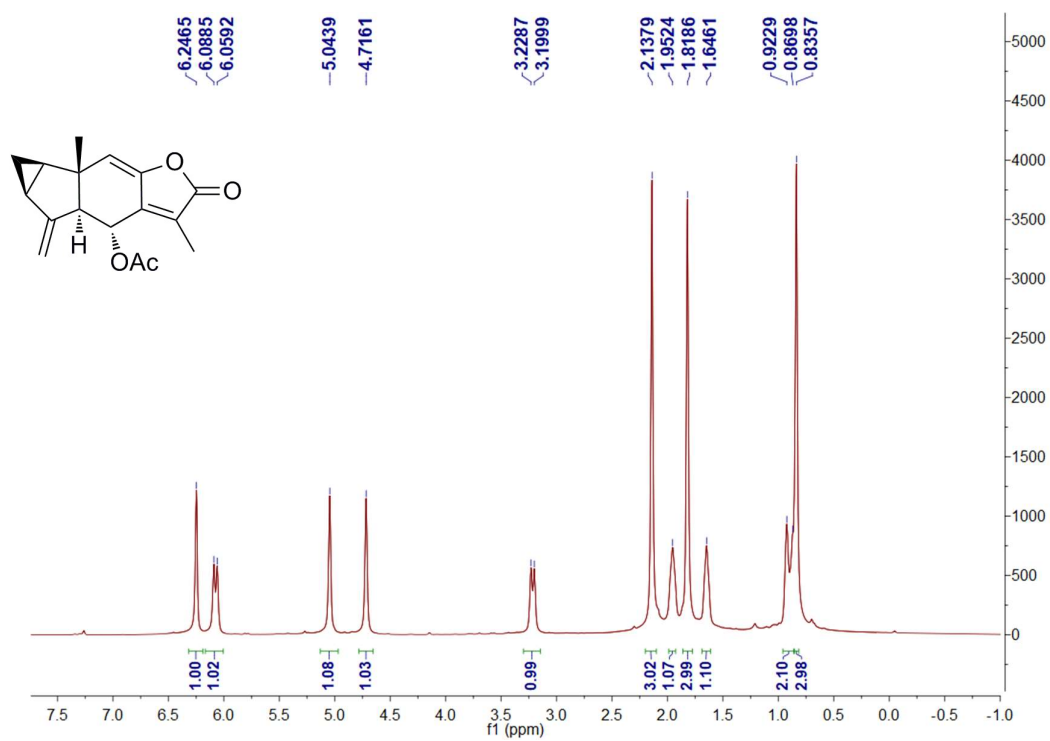

S1. <sup>1</sup>H NMR spectrum of chlojaponilactone B (**1**) (CDCl<sub>3</sub>, 400 MHz)

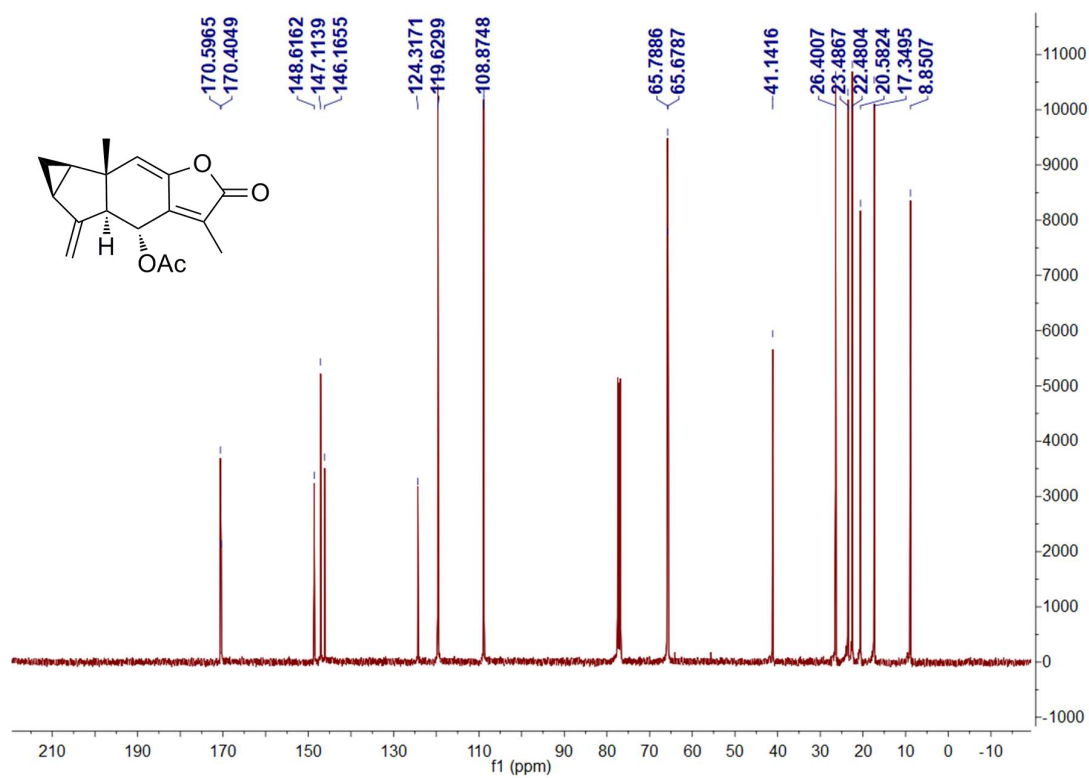

S2.  $^{13}\text{C}$  NMR spectrum of chlojaponilactone B (1) (CDCl<sub>3</sub>, 100 MHz)

### **S3. Cytotoxicity Test**

Cell viability was analyzed using the 3-(4,5-dimethylthiazol)-2,5-diphenyltetrazolium bromide (MTT) assay. RAW 264.7 macrophages were seeded at a density of  $5 \times 10^3$  cells/well in 96-well plates for 24 h. The cells were then treated with **1** or TAK-242 at various concentrations with or without LPS (1  $\mu$ g/ml) for 24h. An equal concentration of a solvent vehicle (DMSO, 0.5%) was included as the control. MTT (5 mg/mL in sterile PBS) solution was added to the culture (20  $\mu$ L/well), followed by incubation for 4 h. Finally, the medium was removed, 100  $\mu$ L DMSO was added to each well, and absorbance was measured at 490 nm by using a microplate reader (Molecular Devices, Sunnyvale, CA, USA).

**S4.**

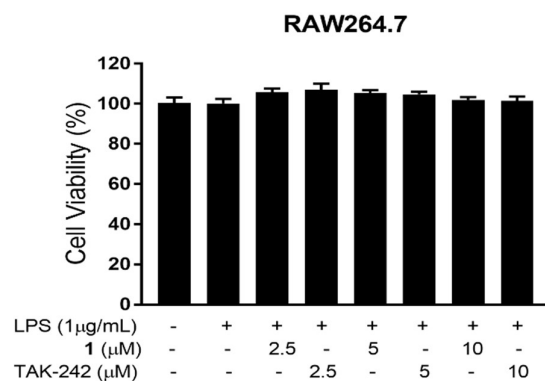

**Figure S1.** Determination of the cytotoxic effects of **1** and TAK-242 in LPS-induced RAW264.7 cells. Cells were incubated with increasing concentrations of **1** (2.5, 5 or 10  $\mu$ M) or TAK-242 (2.5, 5 or 10  $\mu$ M) and treated with LPS (1  $\mu$ g/mL). The cell viability was examined with the MTT assay.
